# Supplementary material for: N95 respirators: quantitative fit test pass rates and usability and comfort assessment by health care workers
Source: PubMed Central journal article supplement — Med J Aust. 2022 May 29;217(2):88–93. doi: 10.5694/mja2.51585 (PMC9347558; doi:10.5694/mja2.51585), 2022-05-29
Supplement: MJA2-217-88-s001.pdf [file MJA2-217-88-s001.pdf]

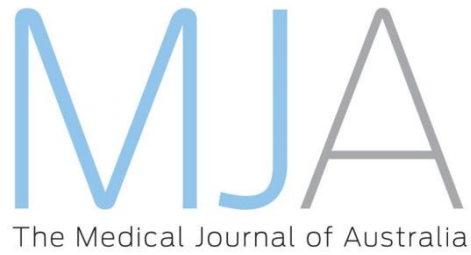

## **Supporting Information**

### **Supplementary results**

**This appendix was part of the submitted manuscript and has been peer reviewed.  
It is posted as supplied by the authors.**

Appendix to: Ng I, Kave B, Begg F, et al. N95 respirators: quantitative fit test pass rates and usability and comfort assessment by health care workers. *Med J Aust* 2022; doi: 10.5694/mja2.51585.

## 1. Characteristics of the N95 respirators used in our study

|                                                | 1860 (3M)         | 1860(S) (3M)      | DE2322 (BYD)                         | Proshield (BSN)   | Fluidshield (Halyard)                | Aura 9320A+ (3M)          |
|------------------------------------------------|-------------------|-------------------|--------------------------------------|-------------------|--------------------------------------|---------------------------|
| <b>Type</b>                                    | Semi-rigid cup    | Semi-rigid cup    | Vertical flat fold cup               | Duckbill          | Duckbill                             | 3-panel flat fold         |
| <b>Inhalation resistance</b>                   | NA                | NA                | 11.2 mmH <sub>2</sub> O <sup>3</sup> | NA                | 10.1 mmH <sub>2</sub> O <sup>8</sup> | ≤ 120 Pa <sup>10,11</sup> |
| <b>Exhalation resistance</b>                   | NA                | NA                | 10.8 mmH <sub>2</sub> O <sup>3</sup> | NA                | 9.4 mmH <sub>2</sub> O <sup>8</sup>  | ≤ 120 Pa <sup>10,11</sup> |
| <b>&gt;99% bacterial filtration efficiency</b> | Pass <sup>1</sup> | Pass <sup>1</sup> | Pass <sup>4</sup>                    | Pass <sup>6</sup> | Pass <sup>8</sup>                    | NA                        |
| <b>&gt;95% particle filtration efficiency</b>  | Pass <sup>1</sup> | Pass <sup>1</sup> | Pass <sup>3</sup>                    | Pass <sup>1</sup> | Pass <sup>9</sup>                    | Pass <sup>10,12</sup>     |
| <b>Fluid resistance level</b>                  | 2 <sup>2</sup>    | 1 <sup>2</sup>    | 3 <sup>5</sup>                       | 3 <sup>7</sup>    | 3 <sup>1</sup>                       | 2 <sup>13</sup>           |

NA = not applicable.

1. HealthShare Victoria. Respirator masks ready reckoner, 30 October 2020. Available from <https://healthsharevic.org.au/assets/COVID-19/Respirator-Masks-ready-reckoner-30Oct20-2.docx> (accessed 25/01/2022). Access restricted to employees of publicly funded health services Victoria.
2. Nelson Laboratories, St Paul MN USA. Synthetic blood penetration resistance GLP report, laboratory number 545173, dated 15 September 2010. <https://healthsharevic.org.au/account/productinformationlibrary>
3. National Institute for Occupational Safety and Health, respirator branch. Test data sheet, task number 23786, dated 23 April 2020. <https://healthsharevic.org.au/account/productinformationlibrary>
4. SGS Hong Kong Limited. Bacterial filtration efficiency test report, test report number: T32020240443SN, dated 28 May 2020. <https://healthsharevic.org.au/account/productinformationlibrary>
5. Nelson Laboratories, Salt Lake City UT USA. Synthetic blood penetration resistance GLP report, laboratory number 1288533-S01, dated 15 April 2020. <https://healthsharevic.org.au/account/productinformationlibrary>
6. Nelson Laboratories, Salt Lake City UT USA. Bacterial filtration efficiency report, laboratory number 188517, dated 20 July 2001. <https://healthsharevic.org.au/account/productinformationlibrary>
7. Nelson Laboratories, Salt Lake City UT USA. Synthetic blood penetration resistance report, laboratory number 274947, dated 25 Oct 2004. <https://healthsharevic.org.au/account/productinformationlibrary>
8. Nelson Laboratories, Salt Lake City UT USA. Bacterial filtration efficiency and differential pressure report, laboratory number 676505, dated 25 Feb 2013. <https://healthsharevic.org.au/account/productinformationlibrary>
9. National Institute for Occupational Safety and Health, respirator branch. Test data sheet, task number TN-18964, dated 24 April 2013. <https://healthsharevic.org.au/account/productinformationlibrary>
10. TestSafe Australia, Londonderry NSW Australia. Summary report, test report 35480, dated 21 October 2020. <https://healthsharevic.org.au/account/productinformationlibrary>
11. Laboratory report only mentions pass/fail not the measured resistance. <https://healthsharevic.org.au/account/productinformationlibrary>
12. This mask is tested to the P2 criteria of AS/NZS 1716:2012, i.e. 94% filtering efficiency.
13. Nelson Laboratories, St Paul MN USA. Synthetic blood penetration resistance final report, laboratory number 1312594-S01, dated 10 July 2020. <https://healthsharevic.org.au/account/productinformationlibrary>

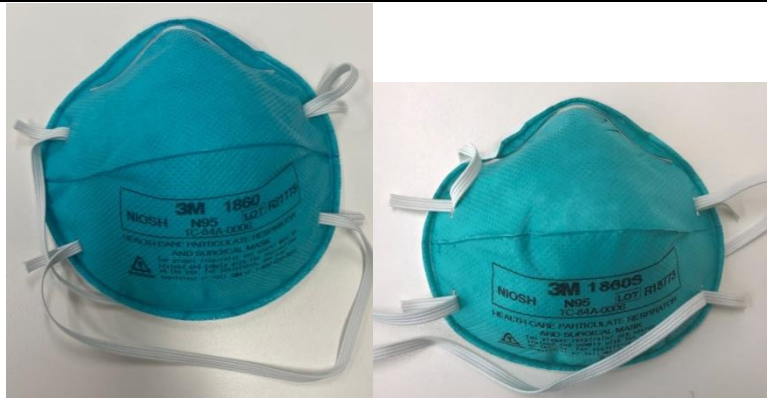

3M 1860, 3M 1860S

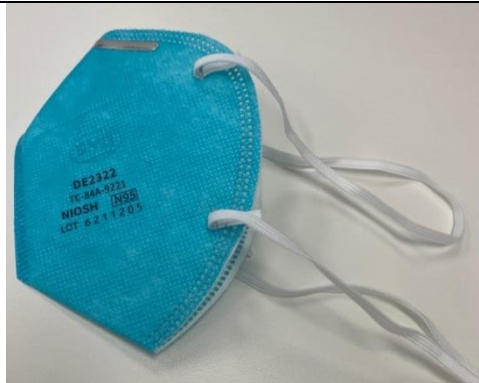

BYD DE2322

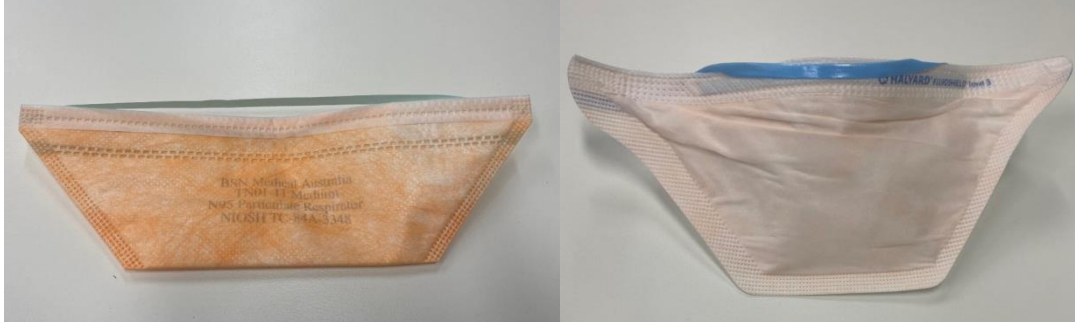

BSN Proshield 72509 TN01-11 Medium; Halyard Fluidshield 46727

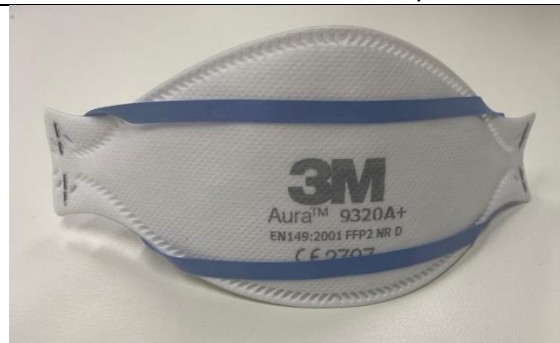

3M Aura 9320A+

## 2. Development and validation process of the usability and comfort assessment survey

There is currently lack of information about respirator performance, and there is no validated evaluation tool available to assess usability and comfort of respirators. Therefore, we were required to design the assessment tool for this study.

The development process involved the followings:

- Review of literature:

Our survey instrument was largely based on project BREATHE criteria <sup>1</sup>, together with other peer reviewed journal articles.<sup>2-8</sup>

- Subject matter experts:

Using a participatory action research framework, eight experienced, hospital-based health practitioners assisted in developing the survey instrument. The group included nurses, anaesthetists, occupational therapists, wound care nurses and infection prevention experts. All of the members were experienced in the use of respiratory protective equipment, and had previously completed quantitative fit testing. They were either managers or members of the Respiratory Protection Program, with expertise in the selection, use, training, and managing problems or complications related to respiratory protective equipment.

- Identification of domains/items:

- The following areas were identified to be important, based on Project BREATHE recommendation <sup>1</sup>:

- i. Safe and effective use: safe donning, safe doffing, user seal check, accuracy with workplace protection, and barrier from blood/fluid penetration.
- ii. Use integration with occupational activities: compatibility with other equipment, vision, communication (both hearing and speaking), and transparency of respirator.
- iii. Comfort and tolerability (no major medical or psychological issues): allergy, breathing resistance (work of breathing), claustrophobia and anxiety.
- iv. Comfort and tolerability with extended or repeated use: pressure (especially nose, cheek, ears and chin), skin irritation, weight of respirator, heat, humidity and odour.

- Deductive process:

We excluded items that were already under current NIOSH/FDA Surgical N95 assessment requirement, such as level of blood and body fluid resistance, equipment compatibility, breathing resistance and allergenicity.<sup>9</sup> We also excluded items that

required specific testing, such as speech intelligibility, heat and humidity measurement.<sup>10</sup> All the respirators used in this study were half-facepiece, light-weight (6-11g), and not transparent, we therefore excluded the following items: vision, weight and transparency of respirator.

- Based on the above deductive method, we were left with three questions for usability: ease of use when donning and doffing, user-seal check success and seal of mask; and three questions for comfort: skin irritation, anxiety limiting use and specific pressure areas.
- Three additional questions were included for comfort assessment, based on previous study findings and our healthcare workers' experience/feedback:
  - i. Firmness of fit - discomfort was often found to be associated with tight-fitting respirator models.<sup>4</sup>
  - ii. Breathability - although breathing resistance could be objectively measured, we believed that there was a subjective component of breathability. Many studies also included the question of impact on breathability in their comfort assessment.<sup>2,7</sup>
  - iii. Eye irritation - there have been increasing reports of face-mask associated ocular irritation and dryness.<sup>11</sup>
- The wording for each question, and the response categories and scales were developed by the consensus of the group.
- A pilot testing was run within the perioperative service at our institution with the introduction of a new N95 respirator. This was to ensure interpretability of the questions. We received 44 responses. Free text responses were also available and results were analysed to check whether any further items need to be added. Questions were modified accordingly based on the responses.

#### Validation process

We established face validity and content validity by conducting a thorough literature review and forming a subject matter expert group. As discussed above, the appropriateness of the contents for each measure was determined by expert judgements, based on previous similar studies, current regulation requirement, a deductive process and feedback from a pilot run. Construct validity (both convergent and discriminant validity) was difficult to verify because there were no accepted alternative measurement tools. We measured the correlation between individual item and the overall score for each domain, and found at least moderate agreement. The overall assessment was

strongly correlated with seal rating ( $\rho=0.7$ ,  $p<0.001$ ); and moderately correlated with seal check ( $\rho=-0.4$ ,  $p<0.001$ ) and ease of use ( $\rho=-0.3$ ,  $p<0.001$ ). The overall comfort rating was strongly correlated with firmness of fit ( $\rho=0.5$ ,  $p<0.001$ ) and breathability ( $\rho=0.6$ ,  $p<0.001$ ).

As pointed out by Gosch<sup>9</sup> and Shaffer<sup>8</sup>, assessment of comfort and usability is almost entirely subjective, and the factors affecting these two domains are not well defined. An alternative method of validation may be required; e.g. validating laboratory-based test methods against clinical outcomes.

## References

1. Centers for Disease Control and Prevention. Better respiratory equipment using advanced technologies for healthcare employees (Project BREATHE). A report of an interagency working group of the US Federal Government. <https://www.cdc.gov/niosh/nppt/hospresptoolkit/pdfs/ProjectBREATHE-final-report-508.pdf> (accessed February 2022)
2. Bryce E, Forrester L, Scharf S, Eshghpour M. What do healthcare workers think? A survey of facial protection equipment user preferences. *J Hosp Infect* 2008; 68: 241-247.
3. Baig AS, Knapp C, Eagan AE, Radonovich LJ. Health care workers' views about respirator use and features that should be included in the next generation of respirators. *Am J Infection Control* 2010; 38: 18-25.
4. Radonovich LJ, Cheng J, Shenal BV, et al. Respirator tolerance in health care workers. *JAMA* 2009; 301: 36-38.
5. Shenal BV, Radonovich Jr. LJ, Cheng J, et al. Discomfort and exertion associated with prolonged wear of respiratory protection in a health care setting. *J Occup Environ Hyg* 2012; 9: 59-64.
6. Shin H, Oh J, Lim TH, et al. Comparing the protective performances of 3 types of N95 filtering facepiece respirators during chest compressions. *Medicine* 2017; 96: e8308.
7. Gershon RRM, Pearson JM, Westra LJ. Evaluation tool for the assessment of personal protective respiratory equipment. *Infect Control Hosp Epidemiol* 2009; 30: 716-717.
8. Shaffer RE, Janssen LL. Selecting models for a respiratory protection program: What can we learn from the scientific literature? *Am J Infection Control* 2015; 43: 127-132.
9. Gosch ME, Shaffer ER, Eagan AE, et al. B95: A new respirator for health care personnel. *Am J Infection Control* 2013; 41: 1224-1230.
10. Kim JH, R.R., Shaffer RE, et al. Project BREATHE - prototype respirator evaluation utilizing newly proposed respirator test criteria. *J Int Soc Respir Prot* 2017; 34: 1-9.
11. Moshirfar, M., W.B. West, and D.P. Marx. Face mask-associated ocular irritation and dryness. *Ophthalmol Ther* 2020; 9: 397-400.

### **3. Post fit-testing follow up usability and comfort assessment**

## Post fit-testing follow up usability and comfort assessment

After the fit testing, you now learn which type and what size of the N95 mask fit you properly. We would like to know what your experience is when wearing them. Please fill in the questions below for each of the mask that fitted you from the fit test.

Mask Type: \_\_\_\_\_

What is the type of the N95 mask?

- Semi-rigid Cup: 3M 1860
- Flat Fold Cup: BYD
- Duckbill: BSN Proshield,
- 3-panel flat-fold: 3M Aura
- Duckbill: Halyard Fluidshield
- Other
- 

Please specify

What is your preferred size when using this type of N95 mask?

- Regular
- Small
- N/A

How many of this type of N95 mask have you used over the past week ?

- 0
- 1
- 2-5
- 6-10
- 11-15
- >15

What is the usual duration of wear in hours before doffing this N95 mask?

- 0
- 1
- 2
- 3
- 4
- >4

Please specify

How would you rate the seal of the mask?

- poor
- adequate
- good
- very good
- excellent

Do you think you passed the user-seal check when wearing the mask?

- Every single time
- Most of the time
- Sometimes
- Rarely
- Never

How would you describe the ease of use when donning and doffing?

- easy
- somewhat difficult
- difficult

How would you describe the firmness of fit on the face?

- too tight
- about right
- too loose



How would you describe the breathability?

- poor
- average
- good

**Have you ever had any of the following problems with this type of N95 mask?**

|                                                                                     | Yes                   | No                    |
|-------------------------------------------------------------------------------------|-----------------------|-----------------------|
| Eye irritation                                                                      | <input type="radio"/> | <input type="radio"/> |
| Skin irritation or rash limiting the duration of use or requiring special skin care | <input type="radio"/> | <input type="radio"/> |
| Anxiety limiting the duration of wear                                               | <input type="radio"/> | <input type="radio"/> |

Significant pressure areas that have limited your duration of use of the mask

|        | Yes                   | No                    |
|--------|-----------------------|-----------------------|
| Nose   | <input type="radio"/> | <input type="radio"/> |
| Cheeks | <input type="radio"/> | <input type="radio"/> |
| Ears   | <input type="radio"/> | <input type="radio"/> |
| Chin   | <input type="radio"/> | <input type="radio"/> |
| Other  | <input type="radio"/> | <input type="radio"/> |

Please specify

How would rate the overall comfort (Feel) of the mask?

- poor
- adequate
- good
- very good
- excellent

What is your overall assessment of this type of N95 mask?

- poor
- adequate
- good
- very good
- excellent

Please add any other free text comments about this type of N95 mask

**4. Free text comments by 89 of 378 participants who completed the usability and comfort survey, by N95 respirator type, with examples\***

|                          | <b>Semi-rigid cup type<sup>1</sup></b>                                         | <b>Flat-fold cup type<sup>2</sup></b>                   | <b>Duckbill<sup>3</sup></b>                                                           | <b>Three-panel flat-fold<sup>4</sup></b>                                    |
|--------------------------|--------------------------------------------------------------------------------|---------------------------------------------------------|---------------------------------------------------------------------------------------|-----------------------------------------------------------------------------|
| <b>All comments</b>      | <b>28</b>                                                                      | 4                                                       | 33                                                                                    | 24                                                                          |
| <b>Positive comments</b> | 9<br><i>"Most secure", "Good seal", "Effective"</i>                            | 0                                                       | 5<br><i>"I feel safe", "Very comfortable"</i>                                         | 9<br><i>"Felt very good", "Very confident with use", "Most comfortable"</i> |
| <b>Negative comments</b> | 20<br><i>"Extreme pressure", "Uncomfortable", "Painful", "Rash/irritation"</i> | 4<br><i>"Not preferred mask", "Don't fit very well"</i> | 16<br><i>"Hard to breathe", "Feels light", "Donning and doffing can be difficult"</i> | 5<br><i>"Smell", "Toxic scent", "Fiddly to put on in a hurry"</i>           |
| <b>Neutral comments</b>  | 2<br><i>"Unable to answer...as only worn for the fit test"</i>                 | 0                                                       | 9<br><i>"I don't use N95 all the time", "Fit test was excellent"</i>                  | 8<br><i>"Haven't used", "Only mask that I passed"</i>                       |
| <b>Logistic problems</b> | 3<br><i>"Difficult in obtaining"</i>                                           | 0                                                       | 3<br><i>"Small duckbills are not readily available"</i>                               | 5<br><i>"Least amount of access", "Difficult to get"</i>                    |

\* Individual respondents could provide comments classified as falling into different categories.

1. Semi-rigid cup type respirator: 3M™ 1860 or 1860S; 2. Flat-fold cup type: BYD N95 respirator; 3. Duckbill type: BSN Medical ProShield® N-95 masks or Halyard Fluidshield N95 masks; 4. Three-panel flat-fold type: 3M™ Aura™ 9320A+.
